# Supplementary material for: Clinical analysis of germline copy number variation in DMD using a non-conjugate hierarchical Bayesian model
Source: PubMed Central journal article supplement (PMC6195989; doi:10.1186/s12920-018-0404-4), 2018-10-20
Supplement: 12920_2018_404_MOESM2_ESM.pdf [file 12920_2018_404_MOESM2_ESM.pdf]

**Table S1:** Selected baseline genes and coefficients of variation

| Gene      | Mean Coverage<br>(DMD-relative) | Coefficient of<br>Variation ( $\sigma/\mu$ ) | Region                |
|-----------|---------------------------------|----------------------------------------------|-----------------------|
| FH        | 9.521                           | 0.037                                        | 1:241661107-241683042 |
| GFM1      | 5.358                           | 0.041                                        | 3:158362403-158409276 |
| FASTKD2   | 7.239                           | 0.045                                        | 2:207631397-207656546 |
| ACADM     | 8.042                           | 0.045                                        | 1:76190464-76228468   |
| AGL       | 2.997                           | 0.050                                        | 1:100316578-100387227 |
| SLC35D1   | 9.892                           | 0.050                                        | 1:67470002-67519716   |
| ALG6      | 6.794                           | 0.052                                        | 1:63836628-63902711   |
| Aggregate | 0.880                           | 0.040                                        |                       |

Mean and coefficient of variation for aggregate baseline are calculated based on total coverage across all baseline genes, such that  $\mu_A = \frac{1}{38} \sum \frac{C_{DMD}}{\sum_i C_i}$ . Note that the total number of baseline genes selected was limited so as to keep  $\mu_A$  relatively close to 1, while holding  $\sigma_A/\mu_A$  low. Specific genomic regions for each of the 112 targets comprising these genes can be found at <http://github.com/vkozareva/geneCNV/>.
