# Supplementary material for: Clinical analysis of germline copy number variation in DMD using a non-conjugate hierarchical Bayesian model
Source: PubMed Central journal article supplement (PMC6195989; doi:10.1186/s12920-018-0404-4), 2018-10-20
Supplement: 12920_2018_404_MOESM3_ESM.pdf [file 12920_2018_404_MOESM3_ESM.pdf]

**Table S2:** Effects of baseline selection on exon-level sensitivity and specificity

| Selected Genes                               | Mean Coverage (DMD-relative) | Sensitivity | Specificity |
|----------------------------------------------|------------------------------|-------------|-------------|
| GFM1                                         | 5.358                        | 0.974       | 0.996       |
| GFM1, ACADM, FH, FASTKD2                     | 1.804                        | 0.961       | 0.998       |
| GFM1, ACADM, FH, FASTKD2, AGL, SLC35D1, ALG6 | 0.880                        | 0.961       | 0.998       |

Varying the number of genes included in the aggregate baseline seemed to have minimal effects on the exon-level sensitivity and specificity for the 15 female test samples. This suggests that the model can perform reasonably well even if suboptimal baseline targets are selected.
