# Supplementary material for: Clinical analysis of germline copy number variation in DMD using a non-conjugate hierarchical Bayesian model
Source: PubMed Central journal article supplement (PMC6195989; doi:10.1186/s12920-018-0404-4), 2018-10-20
Supplement: 12920_2018_404_MOESM4_ESM.pdf [file 12920_2018_404_MOESM4_ESM.pdf]

**Table S3:** Coriell samples used for validation and supplemental experiments

\*Used as negative control for software comparison only

†Used only for supplemental experiments (Figure S7)

| ID       | DMD Mutation      | Sex    |
|----------|-------------------|--------|
| NA05117  | EX45DEL           | Female |
| NA04099  | EX49-52DEL        | Female |
| NA05159  | EX46-50DEL        | Female |
| NA07692  | EX1-18DEL         | Female |
| NA23087  | EX2-30DUP         | Female |
| NA23094  | EX35-43DEL        | Female |
| NA23099  | EX8-17DUP         | Female |
| NA04315  | EX44DEL           | Female |
| NA05264  | 7893delC (No CNV) | Female |
| NA07538* | None              | Female |
| NA20239* | None              | Female |
| NA04100† | EX49-52DEL        | Male   |
| NA23086† | EX2-30DUP         | Male   |
