# Supplementary material for: Clinical analysis of germline copy number variation in DMD using a non-conjugate hierarchical Bayesian model
Source: PubMed Central journal article supplement (PMC6195989; doi:10.1186/s12920-018-0404-4), 2018-10-20
Supplement: 12920_2018_404_MOESM5_ESM.pdf [file 12920_2018_404_MOESM5_ESM.pdf]

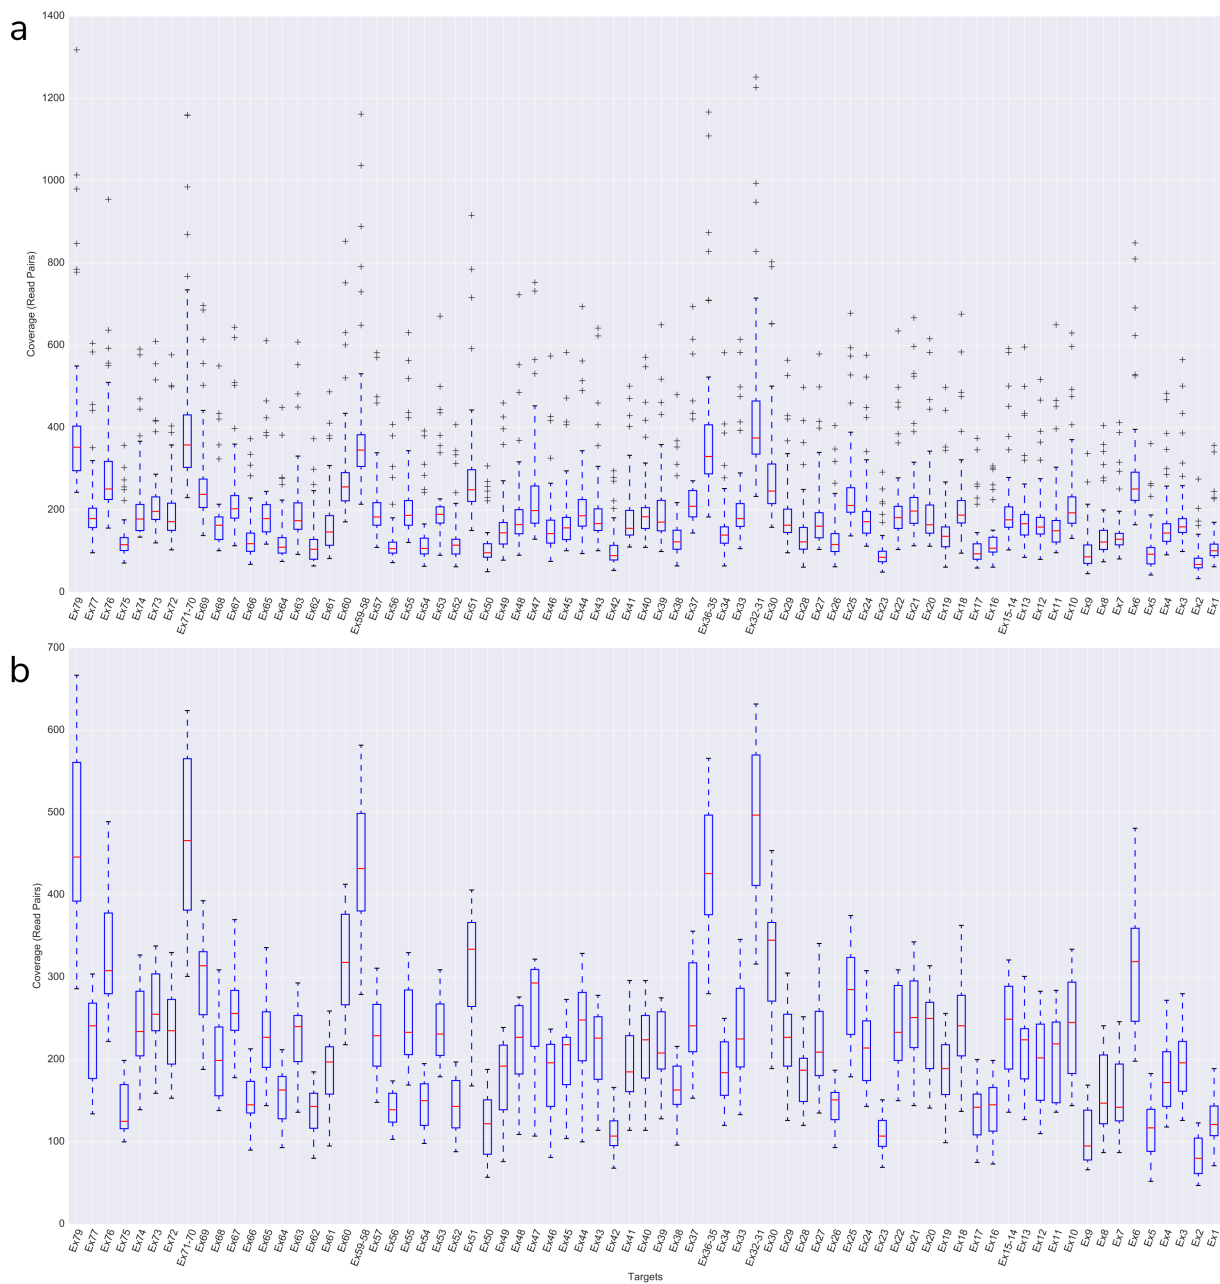

**Figure S2: Read pair coverage for training and test samples** Summary of coverage across primary transcript *DMD* exons for (a) 38 training samples and (b) 15 test samples (see Comparison to other software methods). Boxes indicate first and third quartiles; red bands indicate medians. Whisker ends indicate data within 2.5 IQR of nearest quartile.
