# Supplementary material for: Clinical analysis of germline copy number variation in DMD using a non-conjugate hierarchical Bayesian model
Source: PubMed Central journal article supplement (PMC6195989; doi:10.1186/s12920-018-0404-4), 2018-10-20
Supplement: 12920_2018_404_MOESM10_ESM.pdf [file 12920_2018_404_MOESM10_ESM.pdf]

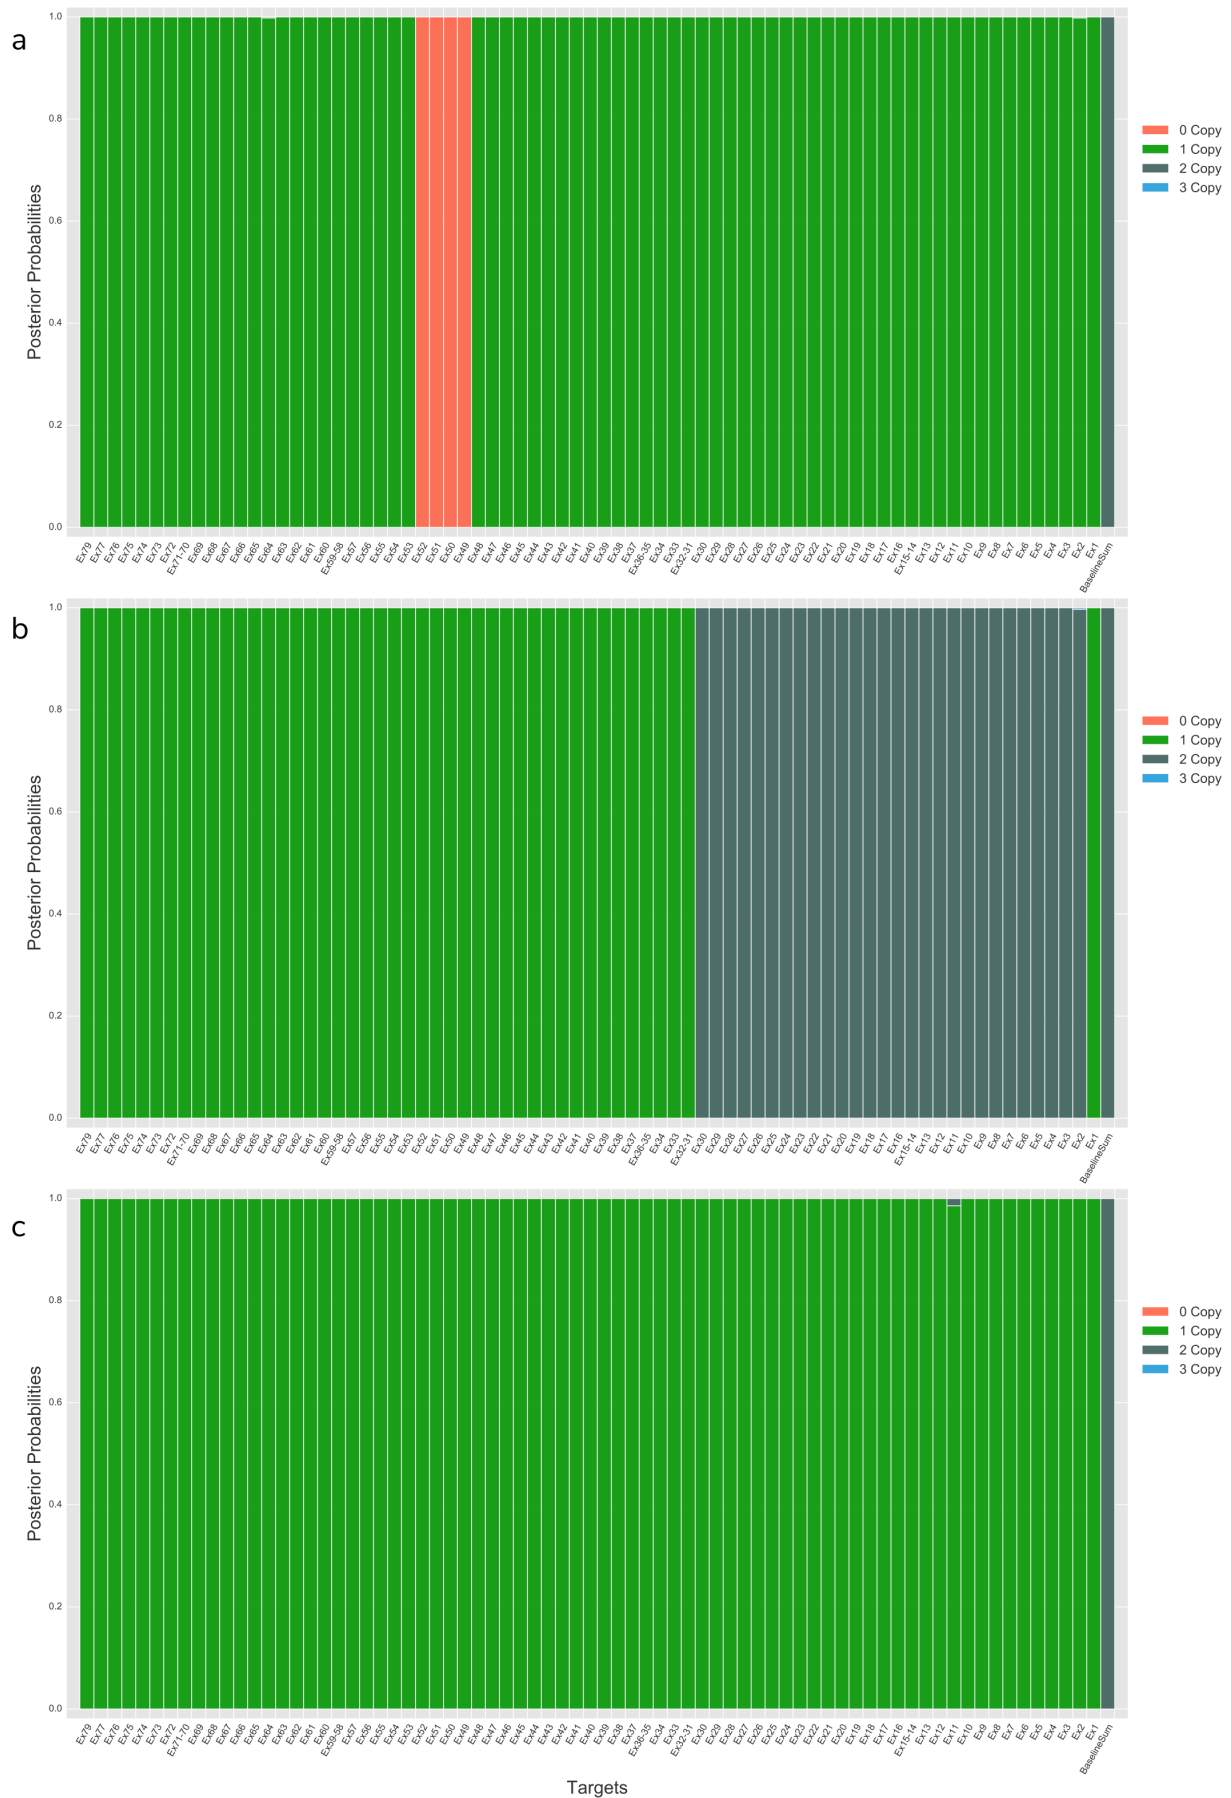

**Figure S7: CNV identification in male subjects** Results for male research and volunteer subjects using geneCNV trained on 38 female subject samples (a) Coriell subject NA04100 (EX49-52 deletion). (b) Coriell subject NA23086 (EX2-30DUP). (c) Volunteer subject with no known CNVs.
